# Supplementary material for: Activity of biogenic silver nanoparticles in planktonic and biofilm-associated Corynebacterium pseudotuberculosis
Source: PeerJ journal article supplement (doi:10.7717/peerj.16751), 2024-02-20

Strain 1002

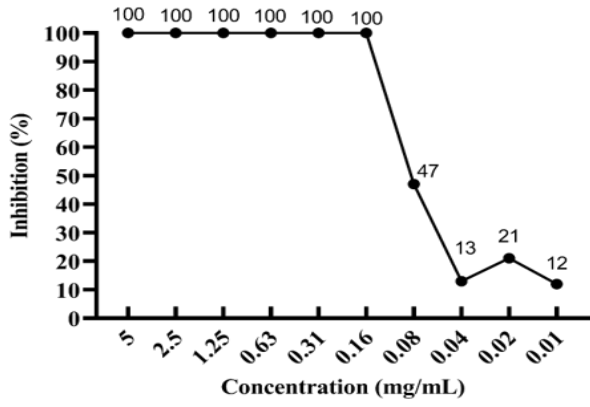

Strain N1

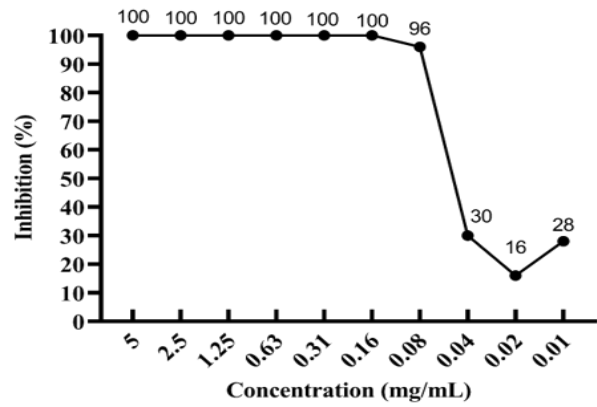

Strain T1

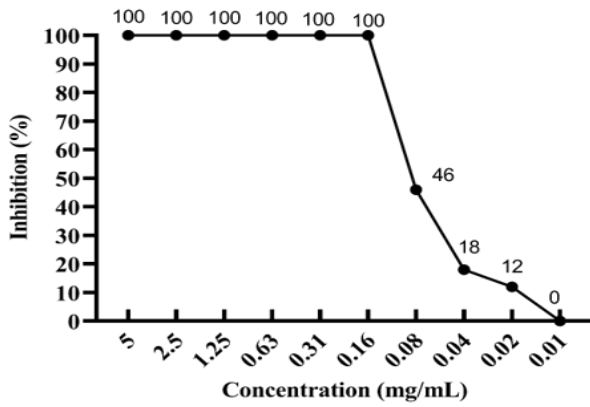

Strain CAPJ4

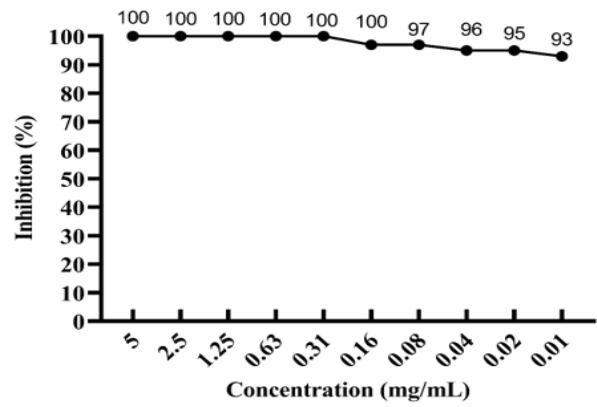

Isolate 05

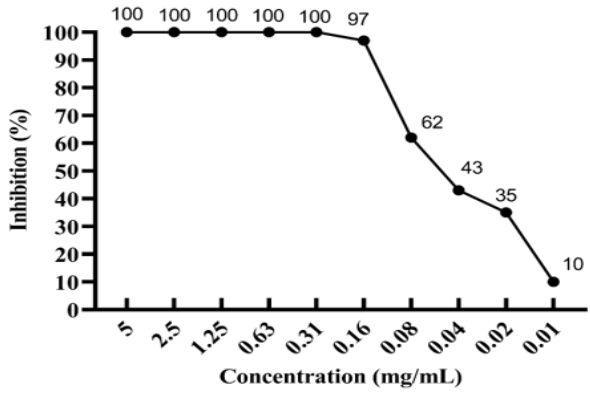

Isolate 06

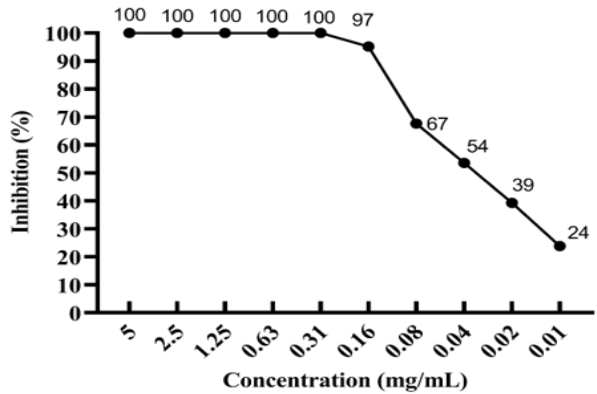

Isolate 15

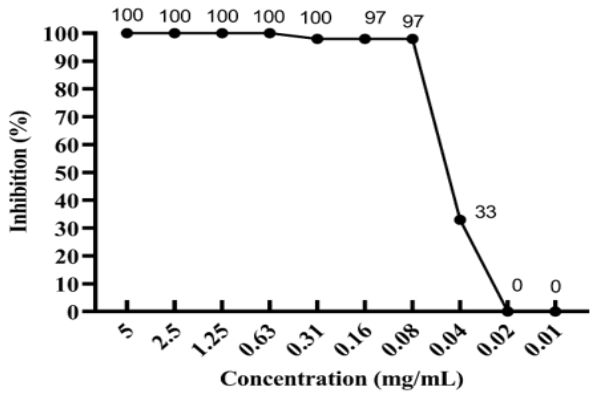

Isolate 96

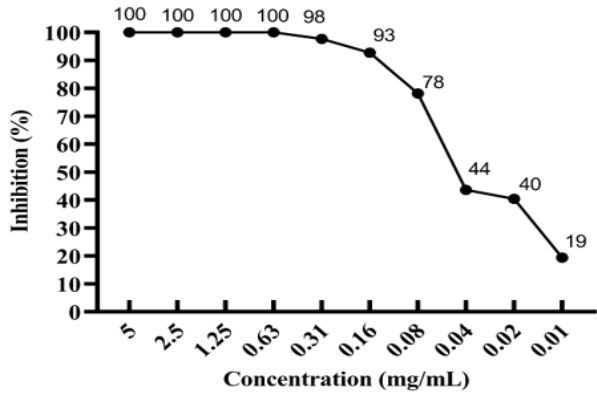

Supplement: FigureS1.pdf [file FigureS1.pdf]
